# Supplementary material
Source: ML conference proceedings conference paper supplement (https://openaccess.thecvf.com/content/CVPR2024/html/Son_FedUV_Uniformity_and_CVPR_2024_paper.html)
Supplement: Supplementary file 1 [file Son_FedUV_Uniformity_and_CVPR_2024_supplemental.pdf]

# FedUV: Uniformity and Variance for Heterogeneous Federated Learning

## Supplementary Material

### 1. FedUV Pseudocode

---

**Algorithm 1** PyTorch-like pseudocode of FedUV

---

```

# n_classes: number of classes
#  $f_\theta$ : local model (outputs predictions  $\hat{y}$  and representations of encoder  $z$ )
#  $\mu := 1$  (strength of hyperspherical uniformity regularization)
#  $\lambda := n\_classes / 5$  (strength of variance regularization)

# Cross-entropy loss
CELoss = torch.nn.CrossEntropyLoss()

# Softmax function
softmax = torch.nn.Softmax(dim=1)

# dimension-wise probability distribution of ideal batch
c = torch.eye(n_classes).std(dim=0).mean().item()

for  $x, y$  in mini_batch:
     $\hat{y}, z = f_\theta(x)$ 

    # Cross-entropy loss
    ce_loss = CELoss( $\hat{y}, y$ )

    # Hyperspherical uniformity regularization
    pdist_z = torch.pdist(z, p=2).pow(2)
    sigma = torch.median(pdist_z[pdist_z != 0])
    u_loss = pdist_z.mul(-1/sigma).exp().mean()

    # Variance regularization
     $\hat{y} = F.one\_hot(\hat{y}, num\_classes=n\_classes)$ 
     $\hat{p} = softmax(\hat{y}.float())$ 
    v_loss = torch.mean(F.relu(c -  $\hat{p}$ .std(dim=0)))

    # Total loss
    loss = (ce_loss +  $\mu * u\_loss + \lambda * v\_loss$ )

    # Optimization
    loss.backward()
    optimizer.step()

```

---

### 2. Details on dataset

There are two main settings across our six datasets. The first setting is label-shift, in which clients hold data of unbalanced classes, and the second setting is feature-shift, in which clients hold data from unbalanced features. The label-shift setting is simulated through the Dirichlet distribution, as is common in many FL studies. In the Dirichlet distribution, the  $\alpha$  parameter influences the shape and concentration. We create a D-vector for each client, defined by this distribution, and use the distribution to represent data proportions per class. The feature-shift setting is not simulated, as we use real data that come from different sources. We verify that there are distributional shifts.

We show the feature and label distributions for included all datasets. The feature distribution is shown as a histogram of the average pixel value of each sample for each client. We set  $\kappa = 10$  for the label-shift datasets, and  $\kappa = 4$  for the domain-shift datasets following the available domains. The label distribution is shown as a heatmap with the x-axis representing the client number, y-axis representing the class number, and the intensity of color showing how many data samples are available.

#### 2.1. Label-shift datasets

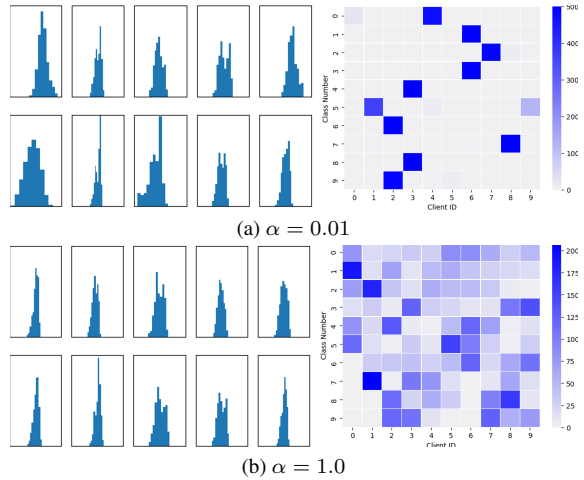

Figure 1. Feature and label distribution of the STL-10 dataset

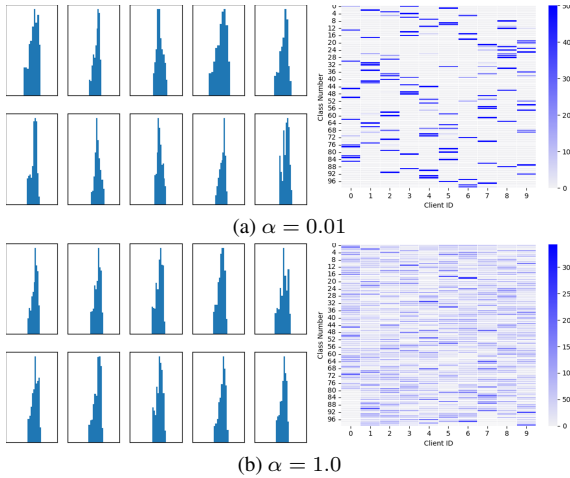

Figure 2. Feature and label distribution of the CIFAR-100 dataset

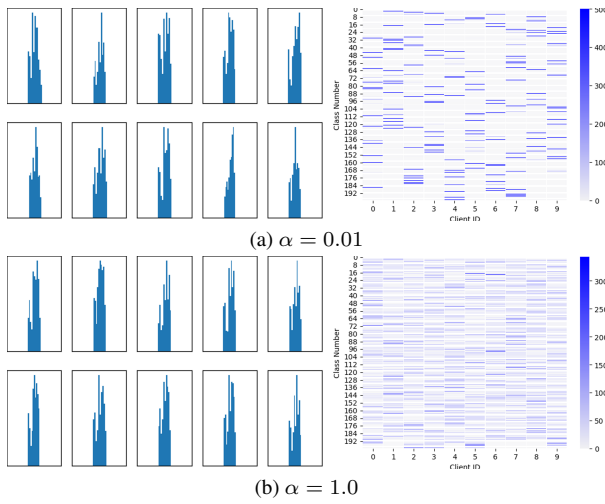

Figure 3. Feature and label distribution of the Tiny-ImageNet dataset

## 2.2. Feature-shift datasets

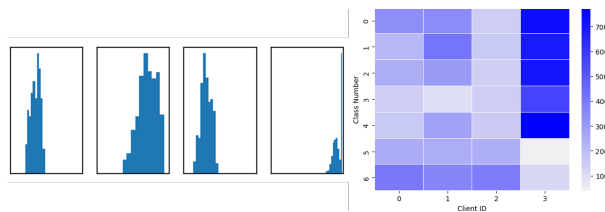

Figure 4. Feature and label distributions of the PACS dataset

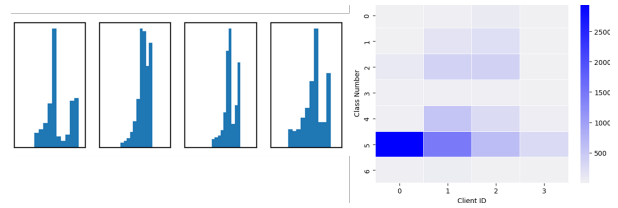

Figure 5. Feature and label distributions of the HAM10000 dataset

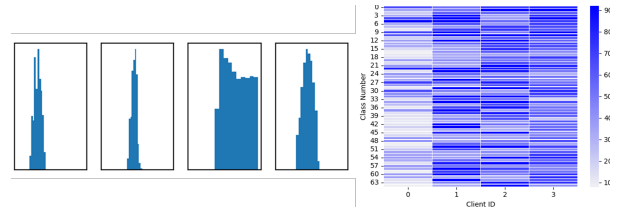

Figure 6. Feature and label distributions of the Office-Home dataset

## 3. The Small CNN model architecture

### Small CNN Architecture

Conv. 3 x 3, 64-BN-ReLu  
 Conv. 1 x 1, 64-BN-ReLu  
 Conv. 3 x 3, stride 2, 128-BN-ReLu  
 Conv. 3 x 3, 128-BN-ReLu  
 Conv. 1 x 1, 128-BN-ReLu  
 Conv. 3 x 3, stride 2, 256-BN-ReLu  
 Conv. 3 x 3, 256-BN-ReLu  
 Conv. 1 x 1, 256-BN-ReLu  
 Global average pooling  
 FC. 256-BN-ReLu x2  
 Logits

Table 1. CNN architecture on STL-10 and PACS

## 4. Regularization Strength Tuning

In real-world FL applications, hyperparameter tuning may not be a realistic approach. Every step in hyperparameter tuning requires many local epochs and many aggregation rounds. This is a heavy burden for local devices. Because of this constraint, we train the Small CNN model (Table 1) on the CIFAR-10 dataset and report the best hyperparameters for each method based on our custom validation set (90-10 split from original training dataset). Table 2 and Table 3 show the results of the hyperparameter tuning on  $\alpha := 0.1$  and  $\alpha := 1.0$  on the CIFAR-10 dataset, respectively. Note that when the strength of regularization becomes too strong for any method, validation accuracy drops as convergence becomes more difficult.

| Method         | $\alpha$    | $\mu$        | $\lambda$          | Acc.         |
|----------------|-------------|--------------|--------------------|--------------|
| FedAvg         | 0.01        | -            | -                  | 34.7%        |
| <u>FedProx</u> | <u>0.01</u> | <u>0.001</u> | -                  | <u>35.5%</u> |
| FedProx        | 0.01        | 0.01         | -                  | 35.4%        |
| FedProx        | 0.01        | 0.1          | -                  | 32.8%        |
| FedProx        | 0.01        | 1.0          | -                  | 32.2%        |
| MOON           | 0.01        | 0.1          | -                  | 35.3%        |
| <u>MOON</u>    | <u>0.01</u> | <u>1.0</u>   | -                  | <u>35.7%</u> |
| MOON           | 0.01        | 5.0          | -                  | 31.1%        |
| MOON           | 0.01        | 10.0         | -                  | 32.0%        |
| FedUV          | 0.01        | 0.1          | n_classes/8        | 45.3%        |
| FedUV          | 0.01        | 0.1          | n_classes/4        | 45.1%        |
| FedUV          | 0.01        | 0.1          | n_classes/1        | 44.4%        |
| FedUV          | 0.01        | 0.5          | n_classes/8        | 45.4%        |
| <u>FedUV</u>   | <u>0.01</u> | <u>0.5</u>   | <u>n_classes/4</u> | <u>37.7%</u> |
| FedUV          | 0.01        | 0.5          | n_classes/1        | 35.8%        |
| FedUV          | 0.01        | 1.0          | n_classes/8        | 45.2%        |
| FedUV          | 0.01        | 1.0          | n_classes/4        | 45.7%        |
| FedUV          | 0.01        | 1.0          | n_classes/1        | 43.1%        |

Table 2. Hyperparameter tuning for methods on CIFAR-10 ( $\alpha := 0.01$ )

| Method         | $\alpha$   | $\mu$        | $\lambda$          | Acc.         |
|----------------|------------|--------------|--------------------|--------------|
| FedAvg         | 1.0        | -            | -                  | 72.4%        |
| <u>FedProx</u> | <u>1.0</u> | <u>0.001</u> | -                  | <u>73.5%</u> |
| FedProx        | 1.0        | 0.01         | -                  | 71.4%        |
| FedProx        | 1.0        | 0.1          | -                  | 68.5%        |
| FedProx        | 1.0        | 1.0          | -                  | 67.5%        |
| MOON           | 1.0        | 0.1          | -                  | 72.5%        |
| <u>MOON</u>    | <u>1.0</u> | <u>1.0</u>   | -                  | <u>74.7%</u> |
| MOON           | 1.0        | 5.0          | -                  | 67.5%        |
| MOON           | 1.0        | 10.0         | -                  | 66.3%        |
| FedUV          | 1.0        | 0.1          | n_classes/8        | 74.0%        |
| FedUV          | 1.0        | 0.1          | n_classes/4        | 74.5%        |
| FedUV          | 1.0        | 0.1          | n_classes/1        | 73.1%        |
| FedUV          | 1.0        | 0.5          | n_classes/8        | 75.0%        |
| <u>FedUV</u>   | <u>1.0</u> | <u>0.5</u>   | <u>n_classes/4</u> | <u>75.3%</u> |
| FedUV          | 1.0        | 0.5          | n_classes/1        | 73.1         |
| FedUV          | 1.0        | 1.0          | n_classes/8        | 75.1%        |
| FedUV          | 1.0        | 1.0          | n_classes/4        | 74.7%        |
| FedUV          | 1.0        | 1.0          | n_classes/1        | 74.3%        |

Table 3. Hyperparameter tuning for methods on CIFAR-10 ( $\alpha := 1.0$ )

## 5. Additional results

Table 4 shows results for FedProto, FedDyn, Scaffold. Note that these methods also change the aggregation process.

| Method   | STL (.01)   | STL (1.0)   | CIFAR (.01) | CIFAR (1.0) | Tiny (.01)  | Tiny (1.0)  | PACS        | HAM         | Office      |
|----------|-------------|-------------|-------------|-------------|-------------|-------------|-------------|-------------|-------------|
| FedAvg   | 27.6        | 68.5        | 51.6        | 58.3        | 37.5        | 40.2        | 61.9        | 73.3        | 42.2        |
| SCAFFOLD | 24.7        | <b>68.7</b> | 50.3        | <b>60.8</b> | 39.3        | 43.1        | 60.1        | 73.7        | 42.1        |
| FedDyn   | 22.8        | 65.7        | 50.7        | 59.7        | 38.3        | 41.3        | 63.1        | 72.4        | 41.1        |
| FedProto | 30.1        | 66.2        | 49.5        | 54.2        | 36.8        | 38.5        | 56.7        | 71.6        | 42.1        |
| FedUV    | <b>30.4</b> | 68.5        | <b>55.7</b> | 59.1        | <b>40.3</b> | <b>43.2</b> | <b>65.9</b> | <b>73.9</b> | <b>45.4</b> |

Table 4. Additional Baselines

FedProto transfers class prototype features, while SCAFFOLD and FedDyn uses an additional term in aggregation. FedUV, MOON, FedProx, and Freeze follow FedAvg aggregation. These baselines do not change our conclusion. FedUV is unique in that it does not rely on the global model for regularization, rather focusing on emulating the IID setting regardless of the current non-IIDness. The global model is not a good source of regularization when data is highly non-IID.

| Model     | FedAvg |      |      |        | FedUV |      |      |        |
|-----------|--------|------|------|--------|-------|------|------|--------|
|           | STL    | Tiny | PACS | Office | STL   | Tiny | PACS | Office |
| Small CNN | 27.6   | 23.4 | 61.9 | 41.2   | 30.4  | 24.2 | 65.9 | 42.9   |
| ResNet-18 | 30.2   | 36.9 | 54.8 | 48.7   | 29.6  | 38.4 | 59.8 | 49.5   |
| ResNet-50 | 27.2   | 37.5 | 47.2 | 42.2   | 28.9  | 40.3 | 49.3 | 45.4   |

Table 5. Model ablation

Ablations for architectures and datasets are shown in Table 5. With the exception of Tiny Imagenet, most datasets are quite small. This small data size is likely the reason the larger ResNet models underperform. Nevertheless, FedUV performs better than FedAvg across all but one (STL — ResNet-18) settings.

| Method        | STL-10 ( $\alpha = 0.01$ ) |               |               | STL-10 ( $\alpha = 1.0$ ) |               |               |
|---------------|----------------------------|---------------|---------------|---------------------------|---------------|---------------|
|               | $\lambda=1.0$              | $\lambda=2.5$ | $\lambda=5.0$ | $\lambda=1.0$             | $\lambda=2.5$ | $\lambda=5.0$ |
| No Hinge      | 29.7                       | 29.7          | 28.4          | 67.9                      | 67.6          | 68.1          |
| Squared Hinge | 29.2                       | 27.1          | 26.8          | 67.5                      | 67.8          | 67.3          |
| Hinge (FedUV) | 30.1                       | 30.4          | 31.1          | 66.6                      | 67.1          | 67.9          |

Table 6. Performance across different regularization strength  $\lambda$

Table 6 shows results for no hinge, squared hinge, and linear hinge (FedUV). Our goal with hinge loss is to remove dimensions that have large variance (negative values) so it does not overpower dimensions with low variance. *No hinge* does not remove negative values and *Squared hinge* turns negative values into positive. This may explain the drop in performance for  $\alpha=0.01$ .
